# Supplementary material for: HIV-1 frameshift efficiency is primarily determined by the stability of base pairs positioned at the mRNA entrance channel of the ribosome
Source: PubMed Central journal article supplement — Nucleic Acids Res. 2012 Dec 15;41(3):1901–13. doi: 10.1093/nar/gks1254 (PMC3561942; doi:10.1093/nar/gks1254), 2012-12-15

# **HIV-1 frameshift efficiency is primarily determined by the stability of base pairs positioned at the mRNA entrance channel of the ribosome**

Kathryn D. Mouzakis, Andrew L. Lang, Kirk A. Vander Meulen, Preston D. Easterday and Samuel E. Butcher\*

**Supplementary Data**

## Supplementary Materials & Methods

Error determination for equation 4

$$\Delta G = \ln K * (-RT) \quad [4]$$

Where,  $K = e^{-\left(\frac{\Delta H}{RT}\right) * \left(1 - \frac{T}{T_m}\right) + \frac{\Delta Cp}{R} \left(\frac{T_m}{T} - 1 + \ln \frac{T}{T_m}\right)}$

The **error in Equation 4** is calculated the following way:

$$\Delta G = A \left(1 - \frac{T}{B}\right), \text{ where } A = \Delta H \text{ and } B = T_m$$

If  $\Delta G = A - ATB^{-1}$ , then the error in  $\Delta G$  is the following:

$$\sigma_{\Delta G}^2 = \sigma_A^2 \left(\frac{d\Delta G}{dA}\right)^2 + \sigma_B^2 \left(\frac{d\Delta G}{dB}\right)^2$$

Where,

$$\sigma_A^2 = (\sigma \Delta H)^2, \sigma_B^2 = (\sigma T_m)^2, \frac{d\Delta G}{dA} = 1 - \frac{T}{B} = 1 - \frac{T}{T_m}, \text{ and } \frac{d\Delta G}{dB} = ATB^{-2} = \frac{\Delta H * T}{T_m^2}.$$

**Supplementary Table 1.** Sequences inserted into the p2luc vectors for plasmid construction

| Construct       | Sequence (5'- 3')                                                                                                                                                 |
|-----------------|-------------------------------------------------------------------------------------------------------------------------------------------------------------------|
| WT <sup>φ</sup> | GATCCTTTTTTAGGGAAGATCTGGCCTTCCCACAAGGGAAGGCCAGGGAATTTTCT<br>TCAGAGCAGACCAGAGCCAACAGCCGCACCGAGCT                                                                   |
| MS1             | GATCCTTTTTTAGGGAAGATGGGGCCTTCCCACAAGGGAAGGCCCCGGAATTTTCT<br>TTCAGAGCAGACCAGAGCCAACAGCCGCACCGAGCT                                                                  |
| MS2             | GATCCTTTTTTAGGGAAGATGGGGCCTTCTTACAAAGGAAGGCCCCGGAATTTTCT<br>TCAGAGCAGACCAGAGCCAACAGCCGCACCGAGCT                                                                   |
| MS3             | GATCCTTTTTTAGGGAAGATGGCGCCTTCTTACAAAAGAAGGCCCCGGAATTTTCT<br>TCAGAGCAGACCAGAGCCAACAGCCGCACCGAGCT                                                                   |
| MS4             | GATCCTTTTTTAGGGAAGATGGCGCCTTACAAAAGGCCGCCGGAATTTTCTTCAGAG<br>CAGACCAGAGCCAACAGCCGCACCGAGCT                                                                        |
| MS5             | GATCCTTTTTTAGGGAAGATGCGTTCCTTGCTTCGGCAAGGAGCGCGGAATTTTCT<br>TCAGAGCAGACCAGAGCCAACAGCCGCACCGAGCT                                                                   |
| MS6             | GATCCTTTTTTAGGGAAGATCTGGCCTTCTTACAAAGGAAGGCCAGGGAATTTTCT<br>TCAGAGCAGACCAGAGCCAACAGCCGCACCGAGCT                                                                   |
| MS7             | GATCCTTTTTTAGGGAAGATCTGGCCTTCTTACAAAAGAAGGCCAGGGAATTTTCTT<br>CAGAGCAGACCAGAGCCAACAGCCGCACCGAGCT                                                                   |
| MS8             | GATCCTTTTTTAGGGAAGATCTGGCACAAGCCAGGGAATTTTCTTCAGAGCAGACC<br>AGAGCCAACAGCCGCACCGAGCT                                                                               |
| MS9             | GATCCTTTTTTAGGGAAGATCTCTGGGGCCCACAAGGGCCCCAGAGGGAATTTTCT<br>TTCAGAGCAGACCAGAGCCAACAGCCGCACCGAGCT                                                                  |
| MS10            | GATCCTTTTTTAGGGAAGATATTGCCTTCCCACAAGGGAAGGCCGGTGAATTTTCT<br>TCAGAGCAGACCAGAGCCAACAGCCGCACCGAGCT                                                                   |
| MS11            | GATCCTTTTTTAGGGAAGATATTGGGCCCCCACAAGGGCCCCGGTGAATTTTCT<br>TTCAGAGCAGACCAGAGCCAACAGCCGCACCGAGCT                                                                    |
| MS12            | GATCCTTTTTTAGGGAAGATATTGCCTTCTTACAAAAGAAGGCCGGTGAATTTTCTT<br>CAGAGCAGACCAGAGCCAACAGCCGCACCGAGCT                                                                   |
| MS13            | GATCCTTTTTTAGGGAAAGATCTGGCCTTCCCACAAGGGAAGGCCAGGGAATTTTCT<br>TTCAGAGCAGACCAGAGCCAACAGCCGCACCGAGCT                                                                 |
| MS14            | GATCCTTTTTTAGGGAGATCTGGCCTTCCCACAAGGGAAGGCCAGGGAATTTTCTT<br>CAGAGCAGACCAGAGCCAACAGCCGCACCAAGAGCT                                                                  |
| MS15            | GATCCTTTTTTAGGGGATCTGGCCTTCCCACAAGGGAAGGCCAGGGAATTTTCTTC<br>AGAGCAGACCAGAGCCAACAGCCGCACCAAGAGCT                                                                   |
| MS16            | GATCCTTTTTTAGGGGATCTCTGCTTCCCACAAGGGAAGCAGAGGGAATTTTCTTC<br>AGAGCAGACCAGAGCCAACAGCCGCACCAAGAGCT                                                                   |
| MS17            | GATCCTTTTTTAGGGGATCTCTGGGGCCCACAAGGGCCCCAGAGGGAATTTTCTT<br>CAGAGCAGACCAGAGCCAACAGCCGCACCAAGAGCT                                                                   |
| 3HJ WT          | GATCCGGGCTGTTGGAAATGTGGAAGGAAGGACACCAAATGAAAGATTGTAAGT<br>AGAGACAGGCTAATTTTTTAGGGAAGATCTGGCCTTCCCACAAGGGAAGGCCAGG<br>GAATTTTCTTCAGAGCAGACCAGAGCCAACAGCCCCACCGAGCT |
| 3HJ Mut         | GATCCCGCATAATGAAATGTGGAAGGTTCTTACCAAATCCTTCTTGTACTGA<br>GAGACAGGCTAATTTTTTAGGGAAGATCTGGCCTTCCCACAAGGGAAGGCCAGGG<br>AATTTTCTTCAGGCCACCAGAGCCAACAGCCCCACCGAGCT      |
| 3HJ MS1         | GATCCGGGCTGTTGGAAATGTGGAAGGAAGGACACCAAATGAAAGATTGTAAGT<br>AGAGACAGGCTAATTTTTTAGGGAAGATGGGGCCTTCCCACAAGGGAAGGCCCCG<br>GAATTTTCTTCAGAGCAGACCAGAGCCAACAGCCCCACCGAGCT |

<sup>φ</sup> The wild-type HIV-1 sequence represents a naturally occurring HIV-1 M subtype B sequence (<http://www.hiv.lanl.gov>, accession number AB078005).

**Supplementary Table 2.** Overall and local thermodynamic stabilities (kcal/mol) at 37 °C.

| Salt | 10 mM Potassium Phosphate           |                                         |                                      | 1 M NaCl                             |                                 |
|------|-------------------------------------|-----------------------------------------|--------------------------------------|--------------------------------------|---------------------------------|
|      | Measured $\Delta G_{\text{Global}}$ | Extrapolated $\Delta G_{\text{Global}}$ | Predicted $\Delta G_{\text{Global}}$ | Predicted $\Delta G_{\text{Global}}$ | $\Delta G_{\text{Local}}$ (3bp) |
| WT   | -14.7 (0.3)                         | -14.9 (0.2)                             | -15.5 (1.8)                          | -21.8 (0.2)                          | -7.5 (0.1)                      |
| MS1  | -16.6 (1.7)                         | -16.8 (0.5)                             | -17.8 (1.8)                          | -24.1 (0.2)                          | -9.8 (0.1)                      |
| MS2  | -14.7 (0.5)                         | -14.3 (0.02)                            | -15.7 (1.8)                          | -22.0 (0.2)                          | -9.8 (0.1)                      |
| MS3  | -                                   | -                                       | -12.8 (1.8)                          | -19.1 (0.2)                          | -9.0 (0.1)                      |
| MS4  | -                                   | -                                       | -9.0 (1.4)                           | -13.7 (0.2)                          | -9.0 (0.1)                      |
| MS5  | -10.9 (0.1)                         | -                                       | -12.3 (1.8)                          | -18.6 (0.2)                          | -7.9 (0.2)                      |
| MS6  | -12.5 (0.3)                         | -12.4 (0.4)                             | -13.3 (1.8)                          | -19.6 (0.2)                          | -7.5 (0.1)                      |
| MS7  | -10.4 (0.1)                         | -                                       | -11.0 (1.8)                          | -17.3 (0.2)                          | -7.5 (0.1)                      |
| MS8  | -                                   | -                                       | -3.7 (0.9)                           | -6.8 (0.1)                           | -7.5 (0.1)                      |
| MS9  | -                                   | -                                       | -18.2 (1.8)                          | -24.5 (0.2)                          | -6.4 (0.1)                      |
| MS10 | -11.1 (0.4)                         | -11.2 (0.1)                             | -10.0 (1.8)                          | -16.3 (0.3)                          | -2.0 (0.2)                      |
| MS11 | -                                   | -                                       | -14.5 (1.8)                          | -20.8 (0.3)                          | -2.0 (0.2)                      |
| MS12 | -6.8 (0.1)                          | -                                       | -5.5 (1.8)                           | -11.8 (0.3)                          | -2.0 (0.2)                      |
| MS13 | -                                   | -                                       | -16.8 (2.0)                          | -23.6 (0.2)                          | -6.0 (0.1)                      |
| MS14 | -                                   | -                                       | -13.5 (1.7)                          | -19.3 (0.2)                          | -8.3 (0.1)                      |
| MS15 | -                                   | -                                       | -12.4 (1.5)                          | -17.6 (0.2)                          | -9.9 (0.1)                      |
| MS16 | -                                   | -                                       | -10.1 (1.5)                          | -15.3 (0.2)                          | -7.5 (0.1)                      |
| MS17 | -                                   | -                                       | -14.6 (1.5)                          | -19.8 (0.2)                          | -7.2 (0.1)                      |

Standard errors shown in parenthesis.  
- Not determined.  
Extrapolated = determined using a urea titration (Materials & Methods).  
 $\Delta G_{\text{Local}}$  is shown for three base pairs.

**Supplementary Table 3.** Correlations between  $\Delta G_{\text{Local (N bp)}}$  and frameshift efficiency for the WT and MS1-12 RNAs

| N (base pairs)                                                      | $R^2$ |
|---------------------------------------------------------------------|-------|
| 1                                                                   | 0.61  |
| 2                                                                   | 0.70  |
| 3                                                                   | 0.88  |
| 4                                                                   | 0.86  |
| 5                                                                   | 0.87  |
| 6                                                                   | 0.87  |
| 7                                                                   | 0.84  |
| 8                                                                   | 0.55  |
| 9                                                                   | 0.44  |
| 10                                                                  | 0.25  |
| Correlations examined using a one-phase exponential decay equation. |       |

**Supplementary Figure 1.** A) Representative thermal denaturation experiments in 10 mM potassium phosphate, pH 7.0, with various concentrations of urea. Red lines are indicative of the fit. The calculated  $\Delta G_{\text{Global}}$  is shown for each. B)  $\Delta G_{\text{Global}}$  at 0 M urea was extrapolated using the linear regression fit of  $\Delta G_{\text{Global}}$  at 4, 6, and 8 M urea.

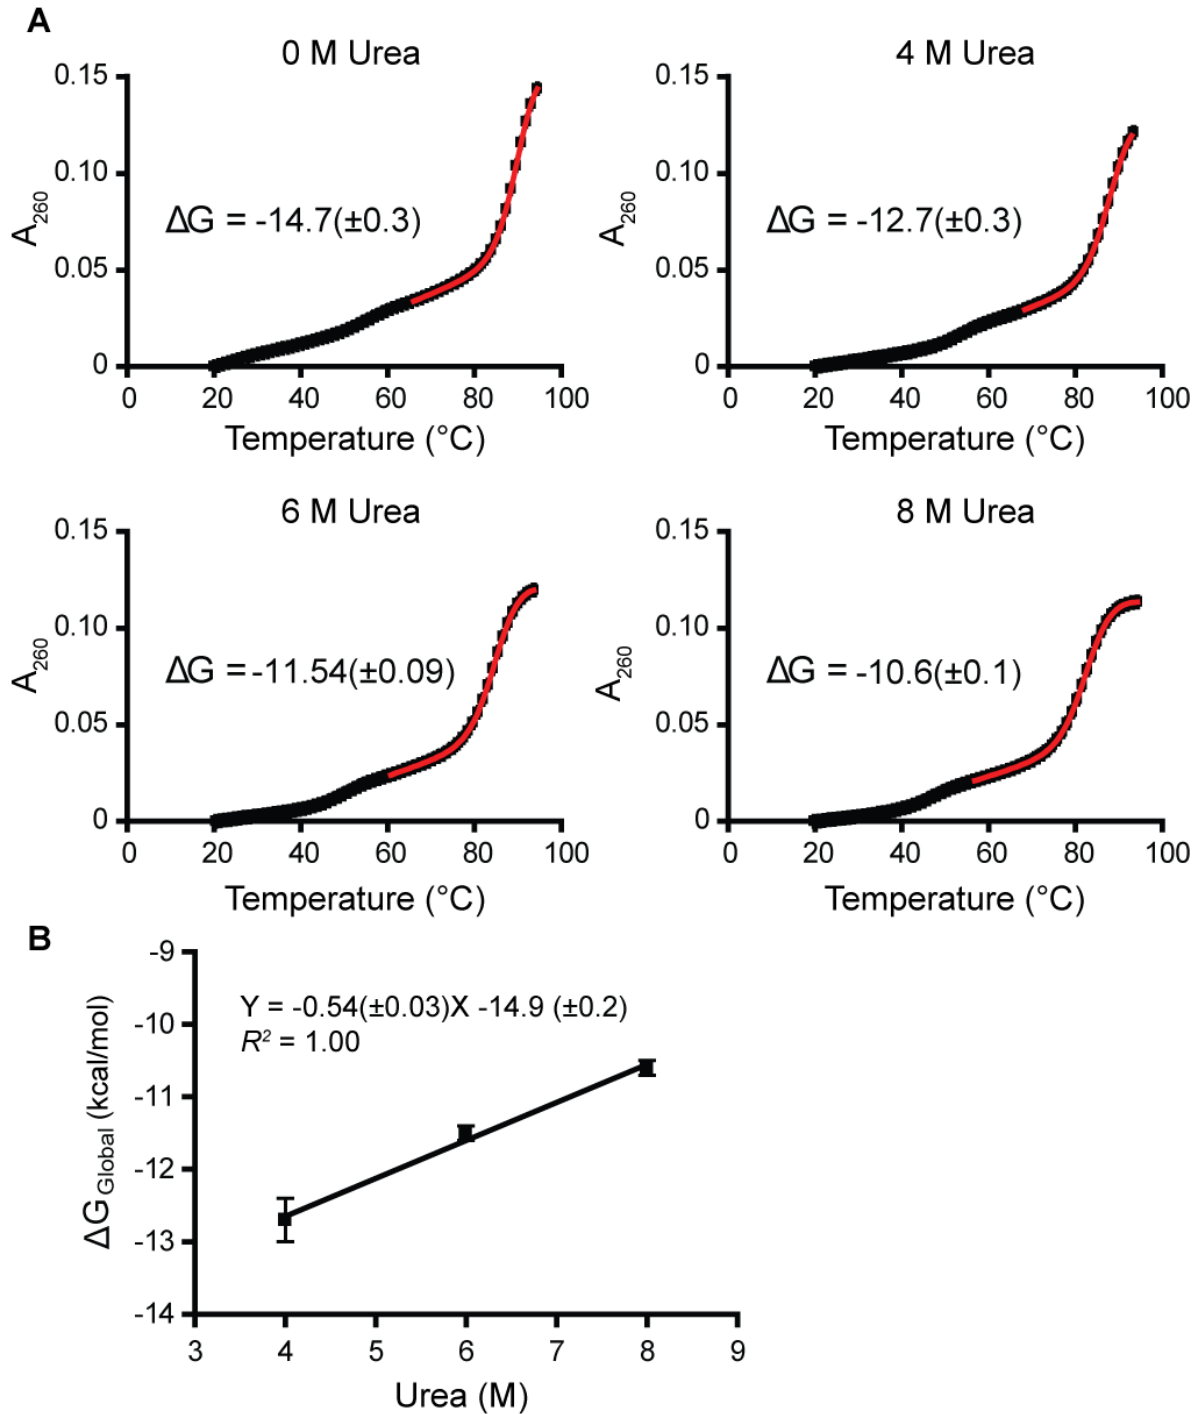

**Supplementary Figure 2.** Defining the relationship between stem-loop local stability and frameshift efficiency. A-J) Using a one-phase exponential decay equation, correlations between local stability and frameshift efficiency for WT and MS1-17 were examined. Local stability was calculated using nearest-neighbor parameters for the indicated number of base pairs. K) Global stability vs. frameshift efficiency for WT and MS1-17. L) Local stability of the top of the stem-loop does not correlate to frameshift efficiency. A representative plot is shown.

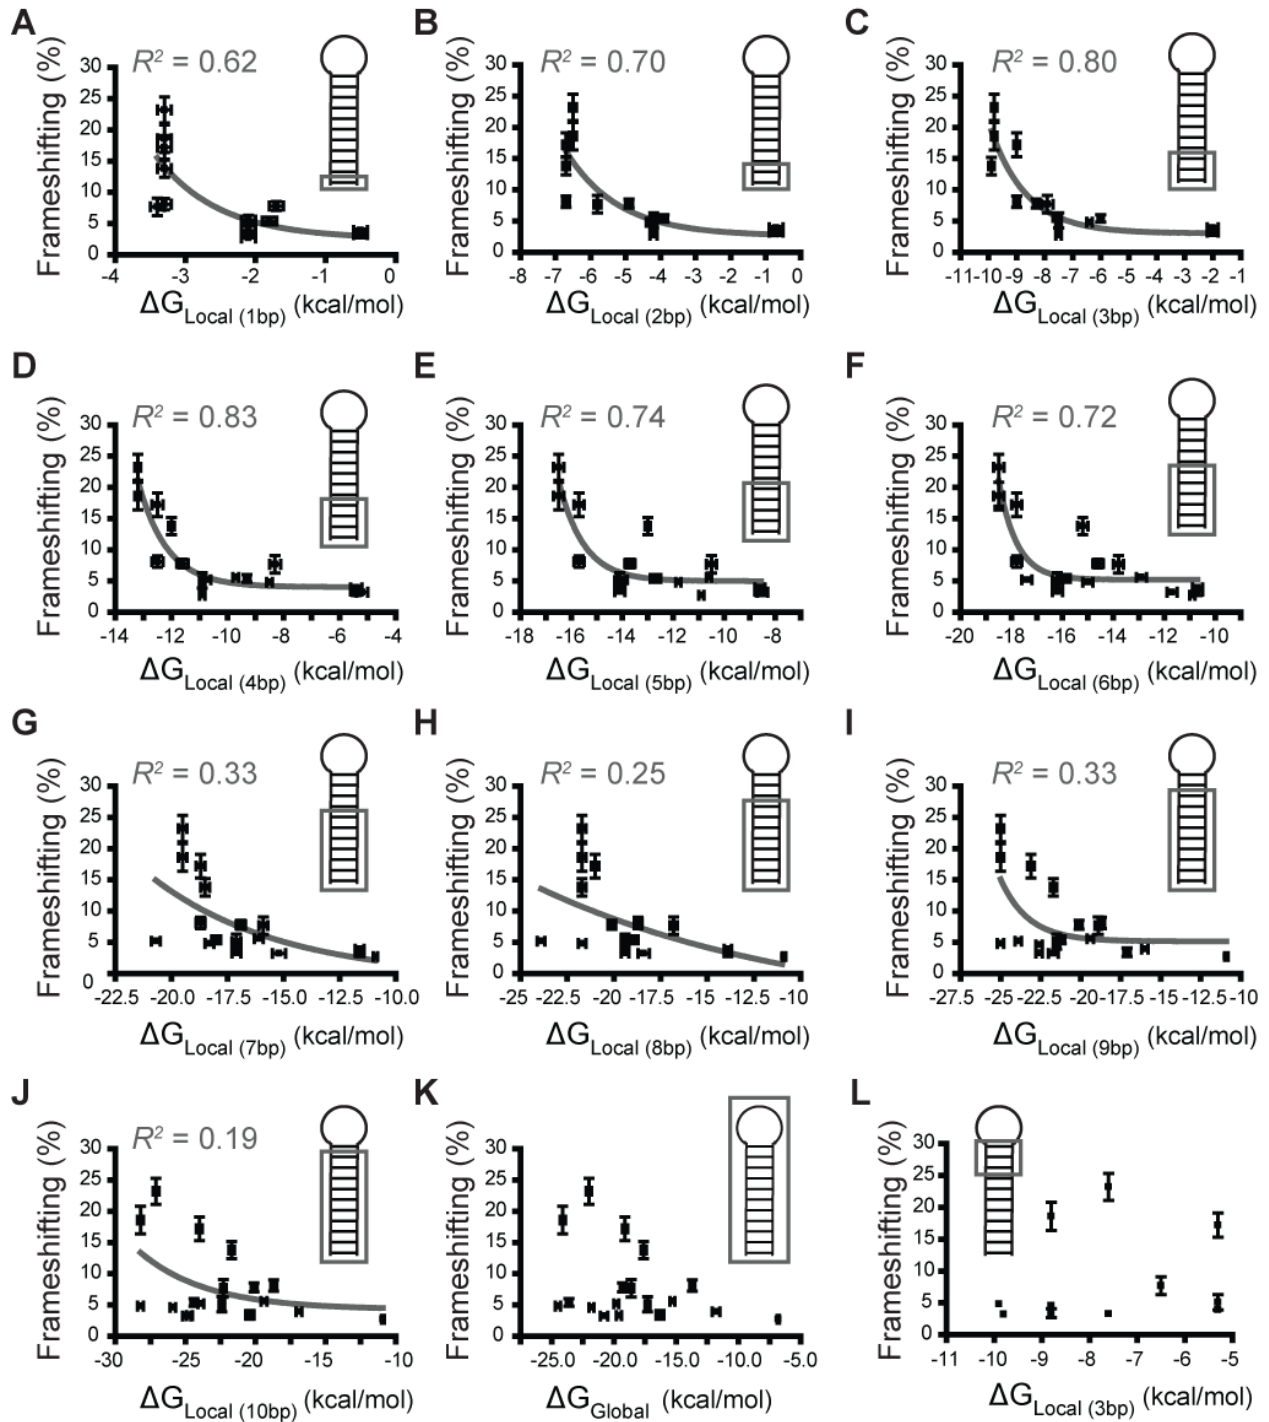

**Supplementary Figure 3.** A) MS RNA secondary structures redrawn in the context of a 7 nt spacer.

Local stabilities are shown for 3 to 6 base pairs. B) Local stability vs. frameshift efficiency. A single exponential decay function was fit to the data. The number of base pairs used to calculate local stability is indicated.

**A**

|                           | WT          | MS1         | MS2         | MS3         | MS4         | MS5         |
|---------------------------|-------------|-------------|-------------|-------------|-------------|-------------|
|                           | C A         | C A         | C A         | C A         | C A         | U C         |
|                           | A A         | A A         | A A         | A A         | A A         | U C         |
|                           | C-G         | C-G         | U-A         | U-A         | C-G         | G-C         |
|                           | C-G         | C-G         | C-G         | U-A         | C-G         | C-G         |
|                           | C-G         | C-G         | C-G         | C-G         | A A         | U-A         |
|                           | U-A         | U-A         | U-A         | U-A         | U-A         | C-G         |
|                           | U-A         | U-A         | U-A         | U-A         | C-G         | G-C         |
|                           | C-G         | C-G         | C-G         | C-G         | C-G         | U-A         |
|                           | C-G         | C-G         | C-G         | C-G         | C-G         | G-C         |
|                           | G-C         | G-C         | G-C         | G-C         | G-C         | U-G         |
|                           | G-C         | G-C         | G-C         | C-G         | C-G         | G-C         |
|                           | U-A         | G-C         | G-C         | G-C         | G-C         | C-G         |
|                           | C-G         | G-C         | G-C         | G-C         | G-C         | G-C         |
|                           | U G         | U G         | U G         | U G         | U G         | U G         |
| $\Delta G_{\text{Local}}$ |             |             |             |             |             |             |
| (3bp)                     | -6.0 (0.1)  | -7.8 (0.1)  | -7.8 (0.1)  | -7.9 (0.2)  | -7.9 (0.2)  | -7.0 (0.2)  |
| (4bp)                     | -9.3 (0.1)  | -11.0 (0.1) | -11.0 (0.1) | -10.3 (0.2) | -10.3 (0.2) | -9.2 (0.2)  |
| (5bp)                     | -12.7 (0.2) | -14.5 (0.2) | -14.5 (0.2) | -13.7 (0.2) | -13.7 (0.2) | -9.5 (0.2)  |
| (6bp)                     | -15.9 (0.2) | -17.7 (0.2) | -17.7 (0.2) | -17.0 (0.2) | -17.0 (0.2) | -11.8 (0.2) |

  

|                           | MS6         | MS7         | MS8         | MS9         | MS10       | MS11       |
|---------------------------|-------------|-------------|-------------|-------------|------------|------------|
|                           | C A         | C A         | C A         | C A         | C A        | C A        |
|                           | A A         | A A         | A A         | A A         | A A        | A A        |
|                           | U-A         | U-A         | U-A         | C-G         | C-G        | C-G        |
|                           | C-G         | C-G         | C-G         | C-G         | C-G        | C-G        |
|                           | C-G         | C-G         | C-G         | C-G         | C-G        | C-G        |
|                           | U-A         | U-A         | U-A         | U-A         | U-A        | C-G        |
|                           | U-A         | U-A         | U-A         | U-A         | U-A        | G-C        |
|                           | C-G         | C-G         | C-G         | C-G         | C-G        | G-C        |
|                           | C-G         | C-G         | C-G         | C-G         | C-G        | G-C        |
|                           | G-C         | G-C         | G-C         | G-C         | G-C        | U-G        |
|                           | G-C         | G-C         | G-C         | G-C         | G-C        | U-G        |
|                           | U-A         | U-A         | U-A         | U-A         | U-A        | U-G        |
|                           | C-G         | C-G         | C-G         | C-G         | A-U        | A-U        |
|                           | U G         | U G         | U G         | U G         | U-G        | U-G        |
| $\Delta G_{\text{Local}}$ |             |             |             |             |            |            |
| (3bp)                     | -6.0 (0.1)  | -6.0 (0.1)  | -6.0 (0.1)  | -6.1 (0.1)  | -1.5 (0.2) | -1.5 (0.2) |
| (4bp)                     | -9.3 (0.1)  | -9.3 (0.1)  | -9.3 (0.1)  | -8.2 (0.1)  | -2.8 (0.2) | -2.8 (0.2) |
| (5bp)                     | -12.7 (0.2) | -12.7 (0.2) | -12.7 (0.2) | -10.3 (0.1) | -6.2 (0.2) | -6.1 (0.2) |
| (6bp)                     | -15.9 (0.2) | -15.9 (0.2) | -12.7 (0.2) | -13.6 (0.2) | -9.5 (0.2) | -9.3 (0.2) |

  

|                           | MS12       | MS13        | MS14        | MS15        | MS16        | MS17        |
|---------------------------|------------|-------------|-------------|-------------|-------------|-------------|
|                           | C A        | C A         | C A         | C A         | C A         | C A         |
|                           | A A        | A A         | A A         | A A         | A A         | A A         |
|                           | U-A        | C-G         | C-G         | C-G         | C-G         | C-G         |
|                           | U-A        | C-G         | C-G         | C-G         | C-G         | C-G         |
|                           | C-G        | C-G         | C-G         | C-G         | C-G         | C-G         |
|                           | U-A        | U-A         | U-A         | U-A         | U-A         | C-G         |
|                           | U-A        | U-A         | U-A         | U-A         | U-A         | C-G         |
|                           | C-G        | C-G         | C-G         | C-G         | C-G         | C-G         |
|                           | C-G        | C-G         | C-G         | C-G         | C-G         | C-G         |
|                           | G-C        | G-C         | G-C         | G-C         | G-C         | G-C         |
|                           | G-C        | G-C         | G-C         | G-C         | G-C         | G-C         |
|                           | U-G        | U-A         | U-A         | U-A         | U-A         | U-A         |
|                           | U-G        | U-G         | U-A         | G-C         | C-G         | C-G         |
|                           | A-U        | U-G         | C-G         | G-C         | U-A         | U-A         |
|                           | U-G        | A G         | C-G         | U-A         | U-A         | U-A         |
| $\Delta G_{\text{Local}}$ |            |             |             |             |             |             |
| (3bp)                     | -1.5 (0.2) | -4.2 (0.1)  | -7.0 (0.1)  | -8.8 (0.1)  | -6.0 (0.1)  | -6.0 (0.1)  |
| (4bp)                     | -2.8 (0.2) | -6.3 (0.1)  | -10.9 (0.2) | -12.1 (0.1) | -9.5 (0.1)  | -9.3 (0.1)  |
| (5bp)                     | -6.2 (0.2) | -9.6 (0.1)  | -14.1 (0.2) | -14.1 (0.2) | -11.5 (0.1) | -12.6 (0.1) |
| (6bp)                     | -9.5 (0.2) | -13.0 (0.2) | -16.2 (0.2) | -15.1 (0.2) | -12.5 (0.2) | -15.8 (0.2) |

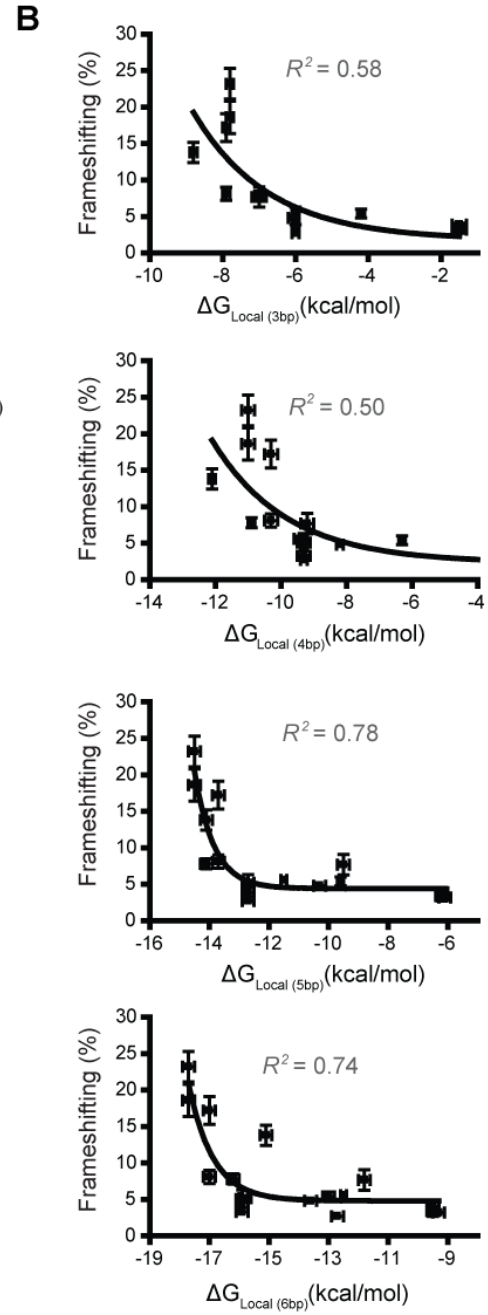

Supplement: supp_gks1254_nar-02153-h-2012-File008.pdf [file supp_gks1254_nar-02153-h-2012-File008.pdf]
